# Supplementary material for: PFAAT version 2.0: A tool for editing, annotating, and analyzing multiple sequence alignments
Source: Springer Nature journal article supplement (doi:10.1186/1471-2105-8-381), 2007-10-11
Supplement: 12859_2007_1753_MOESM1_ESM.pdf [file 12859_2007_1753_MOESM1_ESM.pdf]

File Edit View Find Analysis Help

Name 1:  Name 2:  Name 3:   
Sort Sequences By:  Sort Order:  Font Size:

User assigned number: num 100  
Residue index: res 221  
Alignment column index: aln 386  
seq 9 of 14

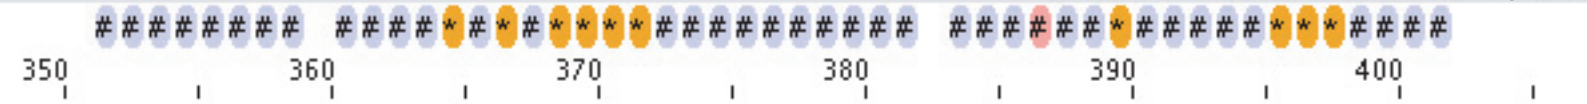

### Name panels

|                                               |    |           |
|-----------------------------------------------|----|-----------|
| NT3_MOUSE                                     | 2  |           |
| NT3_RAT                                       | 2  |           |
| NT3_HUMAN                                     | 2  | TRKC      |
| NT3_FELCA                                     | 2  |           |
| NT3_CHICK                                     | 2  |           |
| NT3_XENLA                                     | 2  |           |
| Q9N2F0_9PRIM                                  | 1  |           |
| NGF_PANTR                                     | 1  |           |
| <input checked="" type="checkbox"/> NGF_HUMAN | 1  | TRKA NGFR |
| sec.struct.graphics                           |    |           |
| Q9N2E9_PONPY                                  | 1  |           |
| NGF_BOVIN                                     | 1  |           |
| NGF_MOUSE                                     | 1  |           |
| NGF_XENLA                                     | 1  |           |
| Q9XY95_LAMFL                                  | -1 |           |

|   |   |   |   |   |   |   |   |   |   |   |   |   |   |   |   |   |   |   |   |   |   |   |   |   |   |   |   |   |   |   |   |   |   |   |   |   |   |   |   |   |   |   |   |   |   |   |   |   |   |   |   |   |   |   |   |   |   |   |
|---|---|---|---|---|---|---|---|---|---|---|---|---|---|---|---|---|---|---|---|---|---|---|---|---|---|---|---|---|---|---|---|---|---|---|---|---|---|---|---|---|---|---|---|---|---|---|---|---|---|---|---|---|---|---|---|---|---|---|
| V | K | N | G | C | R | G | I | D | D | K | - | H | W | N | S | Q | C | K | T | S | Q | T | Y | V | R | A | L | T | S | E | N | N | K | L | V | G | W | R | W | I | R | I | D | T | S | C | V | C | A | L | S | R | K | I | G | R | T | - |
| V | K | N | G | C | R | G | I | D | D | K | - | H | W | N | S | Q | C | K | T | S | Q | T | Y | V | R | A | L | T | S | E | N | N | K | L | V | G | W | R | W | I | R | I | D | T | S | C | V | C | A | L | S | R | K | I | G | R | T | - |
| V | K | N | G | C | R | G | I | D | D | K | - | H | W | N | S | Q | C | K | T | S | Q | T | Y | V | R | A | L | T | S | E | N | N | K | L | V | G | W | R | W | I | R | I | D | T | S | C | V | C | A | L | S | R | K | I | G | R | T | - |
| V | K | N | G | C | R | G | I | D | D | K | - | H | W | N | S | Q | C | K | T | S | Q | T | Y | V | R | A | L | T | S | E | N | N | K | L | V | G | W | R | W | I | R | I | D | T | S | C | V | C | A | L | S | R | K | I | G | R | T | - |
| V | K | N | G | C | R | G | I | D | D | K | - | H | W | N | S | Q | C | K | T | S | Q | T | Y | V | R | A | L | T | S | E | N | N | K | M | V | G | W | R | W | I | R | I | D | T | S | C | V | C | A | L | S | R | K | I | G | R | S | - |
| V | D | S | G | C | R | G | I | D | S | K | - | H | W | N | S | Y | C | T | T | H | T | F | V | K | A | L | T | M | D | G | K | Q | - | A | A | W | R | F | I | R | I | D | T | A | C | V | C | V | L | S | R | K | A | V | R | R | A | - |
| V | D | S | G | C | R | G | I | D | S | K | - | H | W | N | S | Y | C | T | T | H | T | F | V | K | A | L | T | M | D | G | K | Q | - | A | A | W | R | F | I | R | I | D | T | A | C | V | C | V | L | S | R | K | A | V | R | R | A | - |
| V | D | S | G | C | R | G | I | D | S | K | - | H | W | N | S | Y | C | T | T | H | T | F | V | K | A | L | T | M | D | G | K | Q | - | A | A | W | R | F | I | R | I | D | T | A | C | V | C | V | L | S | R | K | A | V | R | R | A | - |
| V | D | S | G | C | R | G | I | D | S | K | - | H | W | N | S | Y | C | T | T | H | T | F | V | K | A | L | T | M | D | G | K | Q | - | A | A | W | R | F | I | R | I | D | T | A | C | V | C | V | L | S | R | K | A | V | R | R | A | - |
| V | S | S | G | C | R | G | I | D | A | K | - | H | W | N | S | Y | C | T | T | H | T | F | V | K | A | L | T | M | E | G | K | Q | - | A | A | W | R | F | I | R | I | D | T | A | C | V | C | V | L | S | R | K | - | G | R | T | - |   |
| T | G | S | A | C | R | G | A | D | E | L | - | R | W | R | S | Q | C | K | T | T | Q | S | F | V | R | A | L | T | E | D | A | R | G | R | L | A | W | R | W | I | R | L | D | T | A | C | V | C | T | L | T | R | R | Y | G | G | A | - |

Column selection panel

Column filter and column sort box

Double click residue annotation

Double click sequence annotations

VNE blosum62

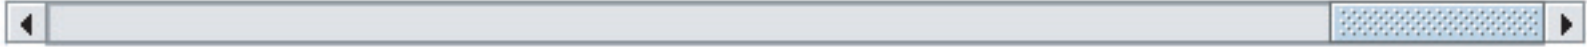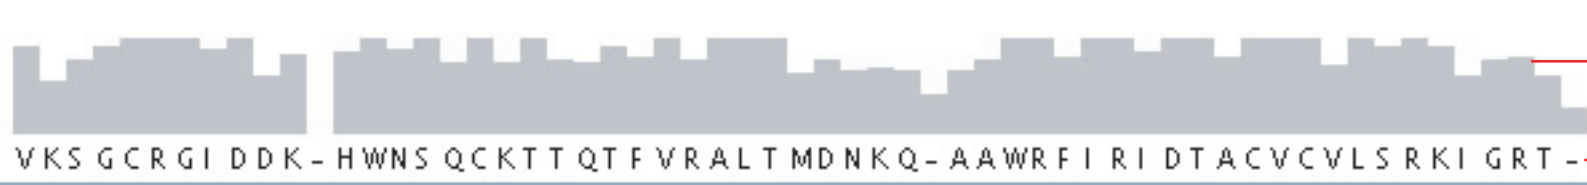

Conservation score

Consensus sequence
