# Supplementary material for: PFAAT version 2.0: A tool for editing, annotating, and analyzing multiple sequence alignments
Source: Springer Nature journal article supplement (doi:10.1186/1471-2105-8-381), 2007-10-11
Supplement: 12859_2007_1753_MOESM4_ESM.pdf [file 12859_2007_1753_MOESM4_ESM.pdf]

Double click node to view  
sequence annotations

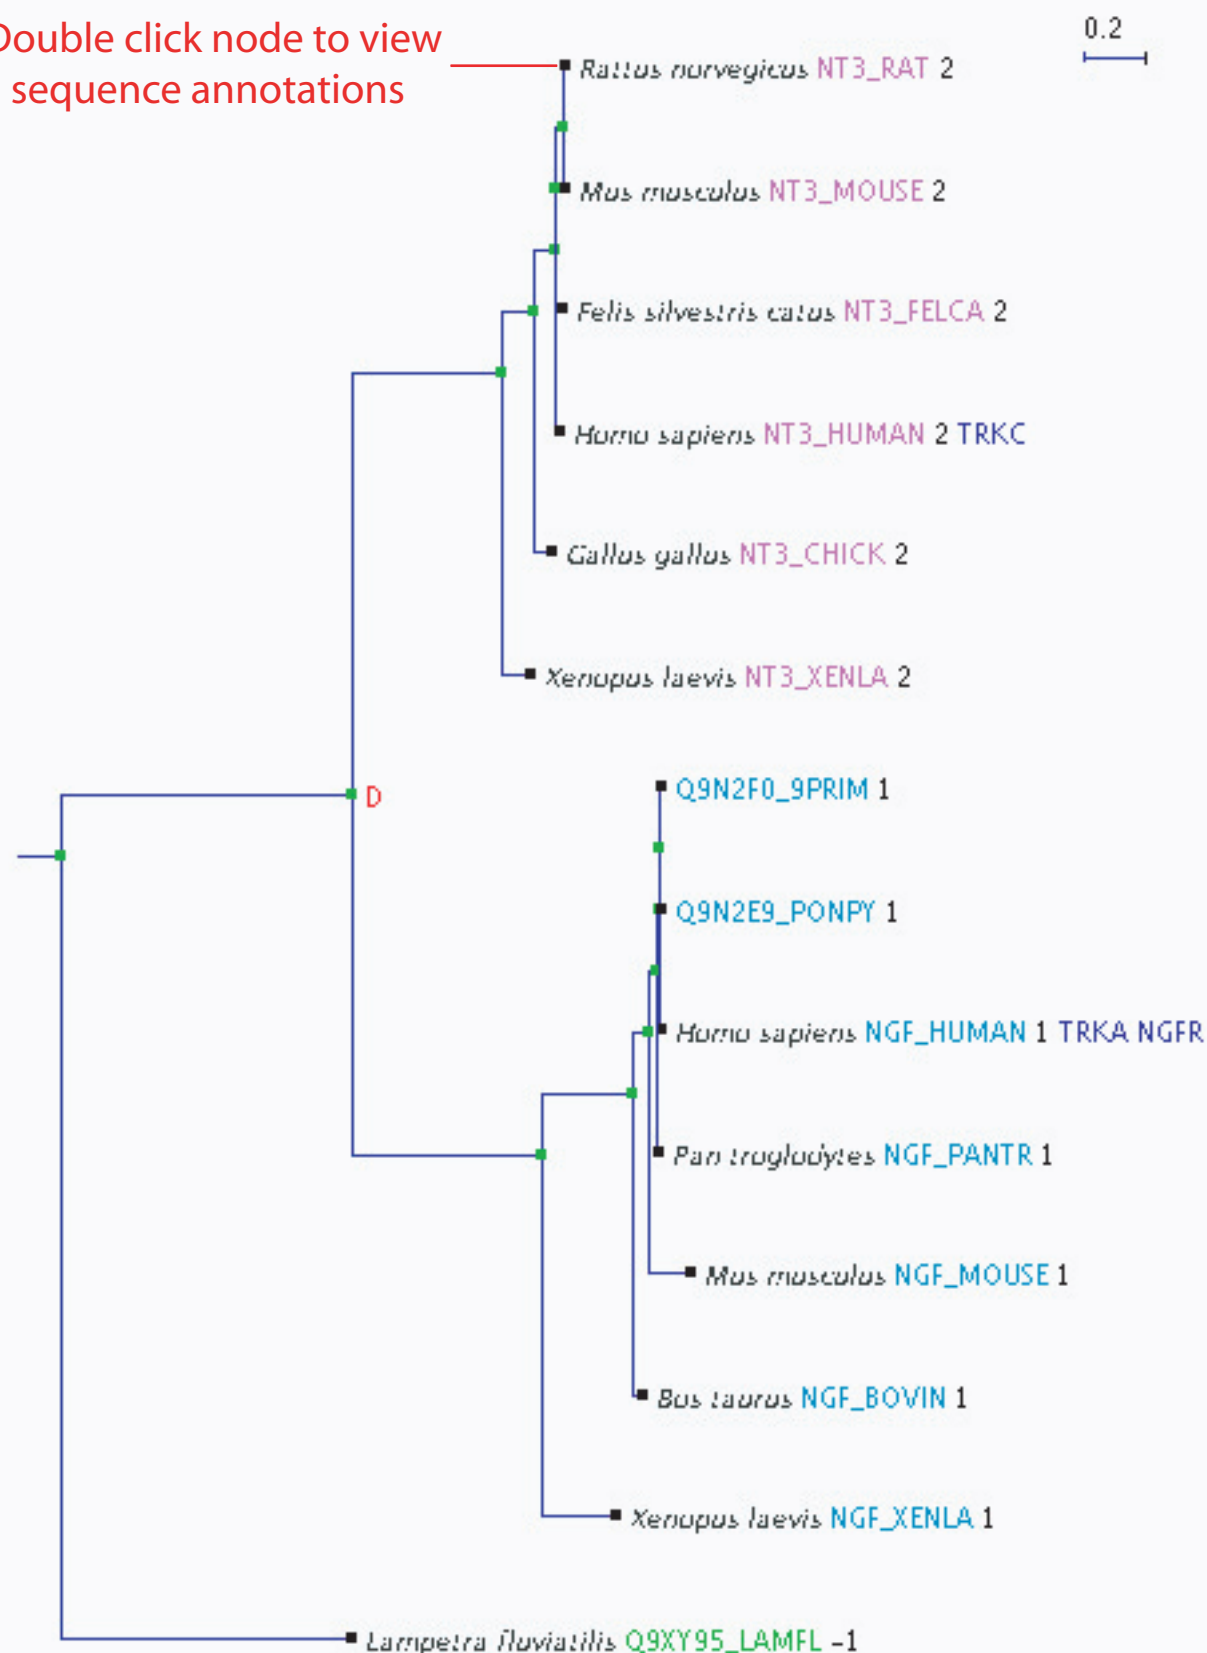

- real branch lengths
- seq name ext nodes
- seq name int nodes
- species ext nodes
- species int nodes
- EC ext nodes
- EC int nodes
- branch length values
- bootstrap values
- duplic vs spec
- display orthology
- display subtr-neighb
- display s-orthology
- log L values
- editable

click on node to:

- display/edit information
- collapse/uncollapse
- root/reroot
- subtree/parent tree
- swap children
- select

zoom in X

zoom out X

zoom in Y

zoom out Y

show whole

order subtrees

uncollapse all

collapse to deepest
